# Supplementary material
Source: Springer Nature journal article supplement (https://www.springermedizin.de/resource/supplementary/12875_2011_565_MOESM4_ESM.pdf/9434962)

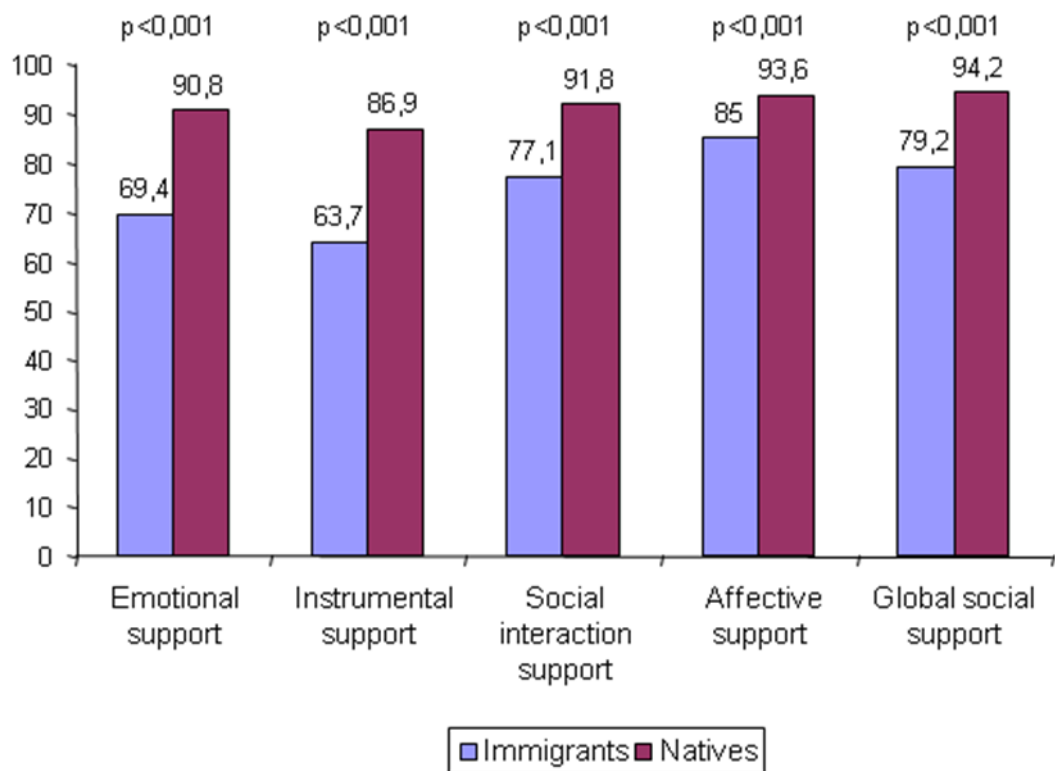

Supplement: MOESM4 [file 9434962]
